# Supplementary material for: Male and female mice show significant differences in hepatic transcriptomic response to 2,3,7,8-tetrachlorodibenzo-p-dioxin
Source: PubMed Central journal article supplement (PMC4546048; doi:10.1186/s12864-015-1840-6), 2015-08-20

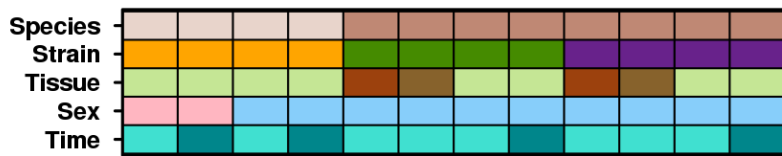

### Species

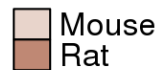

### Strain

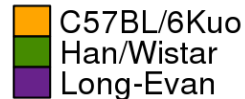

### Tissue

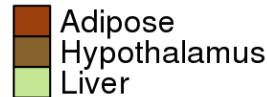

### Time

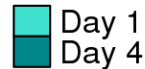

### Sex

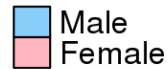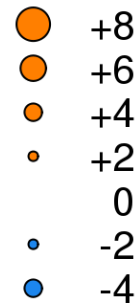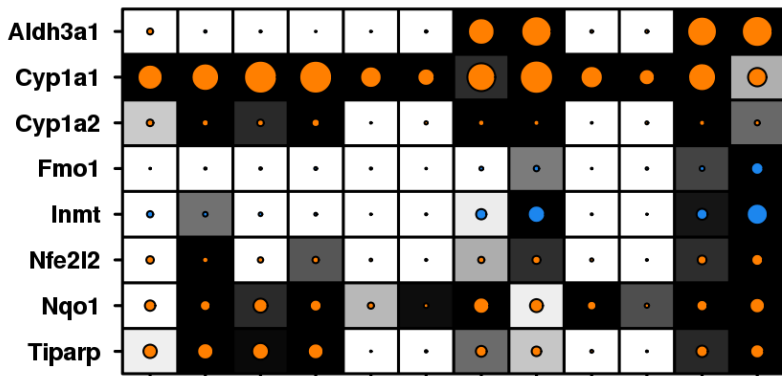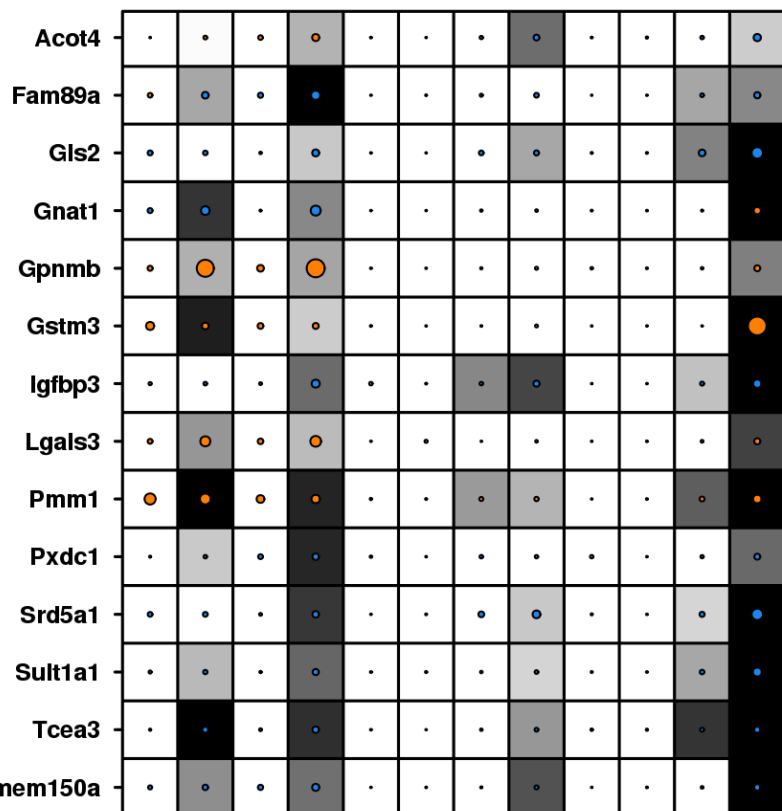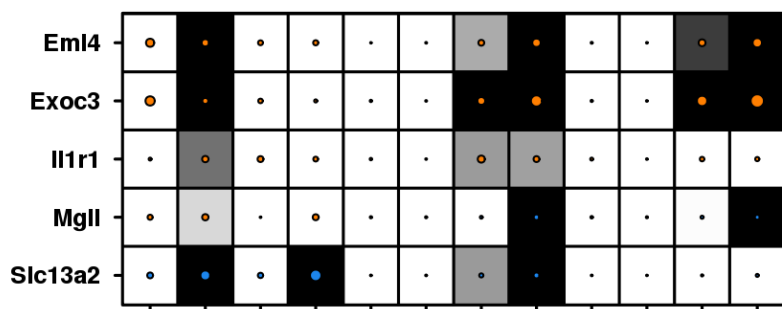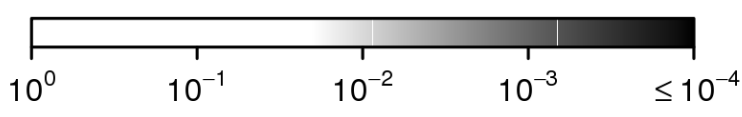

Supplement: 12864_2015_1840_MOESM4_ESM.pdf [file 12864_2015_1840_MOESM4_ESM.pdf]
